# Supplementary material for: Computed tomographic angular measurements using a bone-centered three-dimensional coordinate system are accurate in a femoral torsional deformity model and precise in clinical canine patients
Source: Front Vet Sci. 2023 Apr 17;10:1019216. doi: 10.3389/fvets.2023.1019216 (PMC10149667; doi:10.3389/fvets.2023.1019216)
Supplement: Supplementary file 2 [file Table_2.XLSX]

## Sheet: S1 Table
Individual measurement results of CT based measurements in CT data of 34 dogs with a clinical diagnosis of patellar luxation that underwent preoperative CT of both hind limbs for routine preoperative assessment and planning of surgical correction in a clinical setting.
Dog number (n=34)	Limb number (n=68)	Breed	Side of Hindlimb	Age (years)	Sex	Weight (kg)	Patellar Luxation	FIA-NB			FIA-NC			FIA-NC			FIA-NC			FVA-td			FVA-pd
O1 (1)=observer 1 (first measurement), O1 (2)=observer 1 (second measurement), O2=observer 2								O1 (1)	O1 (2)	O2	O1 (1)	O1 (2)	O2	O1 (1)	O1 (2)	O2	O1 (1)	O1 (2)	O2	O1 (1)	O1 (2)	O2	O1 (1)	O1 (2)	O2
1	1	Mixed-Breed	left	6	male	15	lateral	141.6	142.3	143.5	125.3	126.1	125.1	24.4	24	23.5	20.5	19.9	21.2	182.1	182.4	184.2	186.5	185.6	183.6
1	2	"	right	6	male	15	lateral	142.6	143.1	143.5	123.6	122.3	124	25.6	24.3	23.7	19.2	18.3	16.8	184.2	183.4	181	183.4	184.1	181.2
2	3	Mixed-Breed	left	3	female	7	lateral	150.7	151.3	153.4	121.8	122.3	123.2	34.8	33.9	33.6	25.3	24.3	23.6	185.8	185.3	183.4	187.4	187.3	185.6
2	4	"	right	3	female	7	lateral	151	151.4	151	133.2	133.2	136.3	31.2	30.5	30.1	30.4	32.1	33.7	188.5	187.4	185.5	187.4	187.4	186.8
3	5	Mixed-Breed	left	9	female	8.6	medial	121.1	119.6	118.6	110.8	108.3	104.9	28.1	28.4	31.1	39.8	40.1	43.7	172.2	176.3	168.9	174.2	175	169.7
3	6	"	right	9	female	8.6	non	125	124.3	122	113	113.8	108.9	28.8	28	33.7	34.8	35.3	31.2	175	173.9	171.2	174.3	173.9	172.3
4	7	Chihuahua	left	3	male	2.5	medial	141.7	140.9	138.3	114.3	112.3	110.8	28	27.6	31.1	22.1	23.1	23	178.9	178.3	175.9	178.4	177.4	176.2
4	8	"	right	3	male	2.5	non	137.2	136.4	135.8	110	109.5	107.8	36.7	37.1	34	27.4	26	28.7	176.3	1734.9	172.2	174.4	174.9	173.2
5	9	Chihuahua	left	10	male	2.8	medial	144.3	143.3	142.2	127.4	125.9	121.7	24	24.1	23.7	30.1	32.1	29	176	176.8	177.9	176.4	176.9	179.4
5	10	"	right	10	male	2.8	medial	146.7	147.8	148.1	115.3	113.5	111.2	21.7	22	20.3	33	34.2	36.8	172.9	172.3	170.6	170.3	170	169.4
6	11	Yorkshire Terrier	left	2	female	3.9	medial	136.9	137.8	136.9	107.4	110.1	111.3	23.2	23.7	22.1	20.1	19.6	18.3	168.8	168.6	170.3	168.5	168.4	172.6
6	12	"	right	2	female	3.9	medial	137	138.1	139.9	108.5	110.1	113.4	26.3	27.2	25	21.6	21.2	22.4	165.9	166.6	169.3	171.8	172.3	171.2
7	13	West Highland Terrier	left	1	female	5.6	medial	131.6	132.1	132.2	109.6	107.3	106.8	18	17.9	19.9	19.5	20.1	15.7	174.7	174.8	174.4	174.4	175.1	173.5
7	14	"	right	1	female	5.6	medial	128.5	128.3	124	113	112.2	113.5	23.7	23.1	21.2	26.8	27.1	29.9	177.2	177.8	176	178.3	178.4	177
8	15	French Bulldog	left	2	male	15.7	non	142.9	143.7	143	118.2	118.9	116.6	21.8	20.9	20.9	12.7	13.1	13.6	181	181.8	181.9	178.2	178.4	181
8	16	"	right	2	male	15.7	medial	136.2	137.2	133.4	122	121.1	119.8	21.4	21.4	22.6	12.9	12.8	12	179.5	181.1	182.8	181.2	181.3	181.8
9	17	Chihuahua	left	3	male	2	medial	134	134.7	133.7	110.7	11.5	110.8	24.4	24	24.4	24.7	25.1	26.6	179.5	178.9	178	175.4	176	174.7
9	18	"	right	3	male	2	medial	136.8	137.2	136.7	112.8	112.2	115.3	22.9	24.1	22.9	16.9	17.4	14.9	175.5	176.5	179	179.5	178.9	178.6
10	19	Labrador Retriever	left	1	male	30	non	142.9	141.1	141.4	127	129.4	130.9	26	25.6	23.4	19.6	20.4	21.7	169.7	170.7	172.7	173.2	172.9	173.3
10	20	"	right	1	male	30	medial	139.8	140.1	140.2	128	127.9	126.9	25.7	23.1	24.6	16.9	18.2	15.7	170.2	170.7	169.2	167.9	168.2	168
11	21	English Bulldog	left	1	female	31.4	medial	142	143.2	147.7	139.5	139.8	140.3	3.3	3.2	2.8	8.3	8.1	6.8	172.9	171.3	166.8	169.4	168.5	164.9
11	22	"	right	1	female	31.4	medial	146.5	147.2	148.2	138.9	139.4	141.7	6.3	5.3	5.3	5.1	4.9	2.6	173.8	171.9	172.4	174.8	174.8	172
12	23	Miniature Poodle	left	1	female	4.1	medial	138.7	138.3	135	117.3	117.2	114.2	20.7	19.9	20.7	24.6	26.7	23.5	177.9	178.2	179.5	180.4	180.5	183.4
12	24	"	right	1	female	4.1	medial	139.3	140.1	141.2	115.1	115.7	114.7	19	18.8	20.2	18.5	18.1	18.1	182	181.2	180.7	180	180.9	180.9
13	25	Yorkshire Terrier	left	11	male	4.7	medial	130.8	181.1	128.7	122.9	122.1	124	33.9	33.4	30.1	14.9	15	15.9	172	179.3	167.3	178.5	178.9	177.6
13	26	"	right	11	male	4.7	medial	139.8	138.2	135.6	126.7	126.3	129.9	36.1	36.9	38.1	30.4	29.4	32.2	176	174.2	171.8	173.1	173.1	172.1
14	27	French Bulldog	left	1	female	12	medial	144.7	143.2	140.6	125.9	125.4	126.1	21.5	22	22.1	16.3	19	14.1	174.7	171.9	172	175.9	176.4	173.3
14	28	"	right	1	female	12	medial	142.7	141.6	142.6	120.8	121.1	124.4	22.9	21.9	20.6	16.5	16.9	17.5	169.2	167.8	167.2	168.6	168.9	167.6
15	29	Papillon	left	6	male	3.5	medial	143	142.8	144.9	125.5	127.1	129.6	13.5	12.9	13.4	7.9	8.3	8	177.4	177.9	173.9	174.5	173.4	173.7
15	30	"	right	6	male	3.5	medial	138.4	138.7	139.9	118	119.1	115.3	16.1	17.1	17.5	9.1	8.8	8.4	179.7	181.1	179	180.4	180.5	179.4
16	31	Mixed-Breed	left	1	female	8	medial	143.4	143.9	140.3	121.2	124.1	125.4	9.8	9.2	8.9	10.2	11.1	8.7	161.7	160.8	163.9	164.7	193.9	163.4
16	32	"	right	1	female	8	medial	145.4	145.5	146	132.4	130.2	129.1	42	41.3	43.3	25.6	26.2	29.7	165.8	164.9	162.5	161.9	160.8	159.5
17	33	Mixed-Breed	left	5	male	5.5	medial	135.1	136.9	137.9	118.8	117.8	114.2	24	23.8	22.4	20.1	19.5	23.8	176.5	177.3	178.1	180.4	181.2	179.9
17	34	"	right	5	male	5.5	medial	142.2	142.3	142.7	116.6	117.2	116.2	22.7	21.2	21.7	21.3	21.6	20.2	177.3	177	175.6	178.6	178.9	176.6
18	35	Mixed-Breed	left	3	male	6.5	medial	126.2	127.3	127.2	107.3	106.3	106.2	15.9	14.9	14.5	18	16.7	19.3	171.6	171	170.6	171.3	172.8	170.4
18	36	"	right	3	male	6.5	non	129.6	129	128.9	111	112.1	112.2	19.1	18.4	17.6	11.8	12.1	9.5	180.1	179.3	182.4	184.5	185.2	183.5
19	37	Bavarian Mountain Hound	left	2	male	20	medial	129.6	127.9	128.5	119.8	117.3	115.5	28.7	29.1	29	21.6	22.3	25.1	162	163.9	168.7	163.4	164.9	167.7
19	38	"	right	2	male	20	non	126.1	127.2	128	112.9	114	113.7	26.2	26.7	25.5	21.3	20.9	22.5	166.7	165.9	168.9	168.9	169.2	167.7
20	39	Mixed-Breed	left	1	male	8	medial	144.1	142.9	142.1	120.3	119	118.6	18.2	17.4	15.5	12.4	13.1	10.1	173.6	172.9	171.8	170.4	171.2	172.2
20	40	"	right	1	male	8	medial	138	138.9	137.2	117.6	117.3	115.9	17.9	18.1	18.6	16.4	17.5	14.2	172.1	172	173.8	167.9	168.8	167.5
21	41	Yorkshire Terrier	left	2	female	6.2	medial	135.4	135.6	135.2	117.3	118.9	120.4	15.2	15.3	15.9	15.2	15.9	17.6	163.4	163.2	163.6	165.3	164.4	163.3
21	42	"	right	2	female	6.2	medial	138.1	138.1	139.4	117.8	117.2	115.2	17	17.8	15.5	10.2	8.6	6.3	173.9	173.9	171.9	172.1	171.8	171.5
22	43	Mixed-Breed	left	3	female	10	medial	129.9	127.1	128.2	100.6	100.9	104.5	25.9	26.5	28	32.7	33.2	35.3	170.5	170.4	172.3	171.3	171.9	170.9
22	44	"	right	3	female	10	medial	131	128.5	127	107.1	108.5	108	21.9	22.9	24.7	32.6	31.7	34.7	163.6	163.9	161.7	160.3	159.8	159.6
23	45	Yorkshire Terrier	left	8	female	4.5	medial	137.3	137.3	137.2	115	114.2	113.4	39	38.4	36.1	33.2	34.2	31.6	178	178.9	176.2	179.3	179	178.5
23	46	"	right	8	female	4.5	medial	140.9	140.1	139.3	118.3	118.4	119.4	34.2	35.2	38.4	38.6	38.9	39.3	174.4	176.2	173.5	178.7	176.4	174.4
24	47	Chihuahua	left	4	female	3.5	medial	128.6	128.9	129.2	104.5	108.8	109.3	28.8	28.6	30.5	28.3	29.2	32.6	176.1	175.9	173.3	174.5	176.4	173.6
24	48	"	right	4	female	3.5	medial	129.4	128.7	128.4	110.2	109.4	113.3	21	21.9	22.1	14.3	16.4	15.9	173.7	175.2	176.4	175.9	176	176.1
25	49	Chihuahua	left	3	male	2.5	medial	141.2	140.8	141	117.3	116.9	114.9	20.1	20.4	20.4	20.4	21.6	16.9	172.2	173.1	174.9	174.5	175.1	174.6
25	50	"	right	3	male	2.5	medial	131	132.4	133.2	114.6	114.5	114.4	22	21.6	21.9	26.5	27	28.8	173.3	173.9	174.6	175.9	176.4	174.3
26	51	Yorkshire Terrier	left	2	male	2.5	non	141.1	140.5	141.1	113.6	113.5	114.5	25.7	26	25.3	17.1	18.4	20.1	177.7	178.3	179.4	180.3	180.9	179.8
26	52	"	right	2	male	2.5	medial	134.6	134.9	136.5	112.3	112.3	113.1	18.4	18.9	18.5	11.4	12.3	7.6	175	174.3	173.2	176.9	178	175.9
27	53	Zwergspitz	left	2	female	4.4	medial	134.5	134.9	134.4	120.4	120.9	118	1.2	1.9	2.1	4.9	4.3	4.5	177.4	178.4	179.9	180.8	180.7	179.8
27	54	"	right	2	female	4.4	medial	139.7	138.2	137.3	121.4	122	118.3	6.5	7.1	8.6	4.1	3.8	3.4	177.5	177.3	177	178.9	179.2	177.4
28	55	Mixed-Breed	left	2	male	14.1	medial	133.3	133.8	134.3	114.9	114.5	114.1	23.9	23.5	25.7	15.9	15	16.1	165.2	165.9	168.6	178.4	178.4	168.9
28	56	"	right	2	male	14.1	medial	137.2	137.2	139.5	110.1	112.1	110.9	22.9	23.6	25.2	21	20.4	22.9	165.6	164.8	163	164.9	164.9	162.6
29	57	Miniature Poodle	left	2	male	5.6	medial	139	139.6	140.2	127	127.1	125.7	24.2	24.8	26.2	23.4	22.6	21.4	179	177.1	176.7	176.5	177	176.5
29	58	"	right	2	male	5.6	medial	135.4	135.5	132.3	121	122.3	123.7	29.8	30.3	31.5	26.8	27.5	29.5	181.4	181.7	180.2	181.9	180.1	180.1
30	59	Yorkshire Terrier	left	5	male	3.7	medial	144.2	143.9	144	121.2	120.7	120.3	25.7	26.9	24.3	11.5	12.1	12.6	168.6	167	168.5	170	171.2	169.5
30	60	"	right	5	male	3.7	medial	140.2	139.3	138.2	123.8	124.1	124.8	24.2	24.9	26.6	15.4	15.7	16.5	172.9	171.9	174.8	183.8	184.5	183.2
31	61	Tibetan Terrier	left	12	female	6.8	medial	126.5	124.9	125.6	106.1	106.4	103.6	15.6	14.3	15	20.4	19.9	17.3	174.6	173.2	173.9	173.2	174.2	173.2
31	62	"	right	12	female	6.8	non	128.6	127.9	127.7	109.7	108.4	110.4	25.2	25.9	22	14.9	15.4	19.2	178.3	176.9	176.9	178.9	178.5	178.8
32	63	Miniature Poodle	left	4	male	5	medial	145.4	144.3	144.9	127.7	127.7	124.7	20	19.2	20	23.6	23.9	21.6	179	177.1	178.5	180.4	179.7	178.9
32	64	"	right	4	male	5	medial	145.7	145.1	145.6	126.9	127.5	123.9	17.2	17.9	16.9	12.7	13.4	10.9	175.9	174.9	177	176.8	177	177.3
33	65	Bolonka Zwetna	left	8	male	6.7	medial	123.3	123.9	126.6	107.4	107.9	107.4	34.3	33.2	31.1	24.5	24.8	27.9	176.2	175.9	177.5	178.9	179.7	177.8
33	66	"	right	8	male	6.7	non	130	129.7	128.8	106.8	107.4	109.4	30.7	31	29.8	18.6	19	19.8	181.8	180.8	179.3	179.9	180.2	182
34	67	Spitz	left	1	male	12.5	medial	137	136.3	136.2	123.1	122.7	122.2	16.2	16.4	16.2	15.2	14.9	12.5	180.7	179.4	181.1	181.6	181.7	180.9
34	68	"	right	1	male	12.5	lateral/medial	137.2	136.9	137.2	122.3	123.5	123.8	23.4	23.9	24.7	23.2	22.1	25.7	177.7	176.9	177.7	180.8	179.9	179.3
